# Supplementary material for: MicroRNA-621 Acts as a Tumor Radiosensitizer by Directly Targeting SETDB1 in Hepatocellular Carcinoma
Source: PubMed Central journal article supplement (PMC6369664; doi:10.1016/j.ymthe.2018.11.005), 2018-11-13
Supplement: mmc1.pdf [file mmc1.pdf]

YMTHE, Volume 27

## **Supplemental Information**

### **MicroRNA-621 Acts as a Tumor Radiosensitizer by Directly Targeting SETDB1 in Hepatocellular Carcinoma**

**Yingjie Shao, Xing Song, Wenjie Jiang, Yuan Chen, Zhonghua Ning, Wendong Gu, and Jingting Jiang**

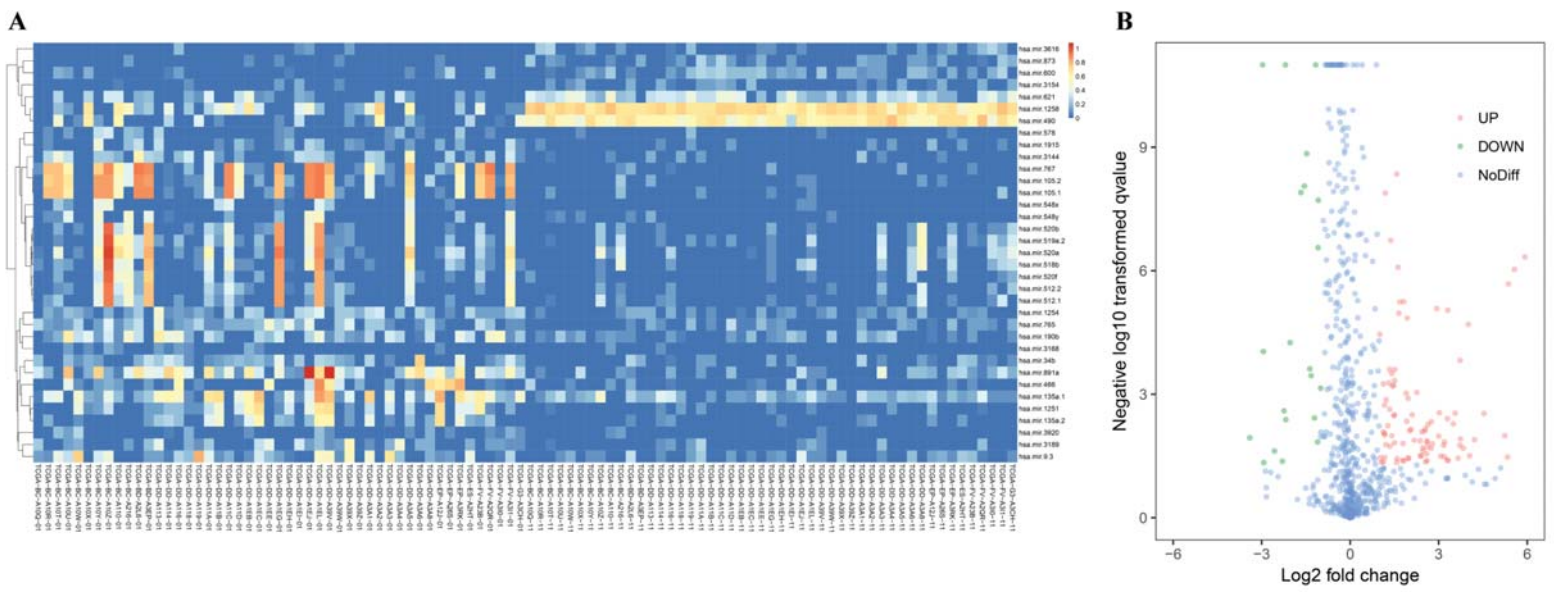

**Supplemental Figure 1** Analysis of differentially expressed miRNAs in HCC by TCGA datasets (Fold change >3.0,  $P < 0.01$  in *t-test*). (A) Differentially expressed miRNAs shown in heatmap. (B) Differentially expressed miRNAs shown in volcano plot.

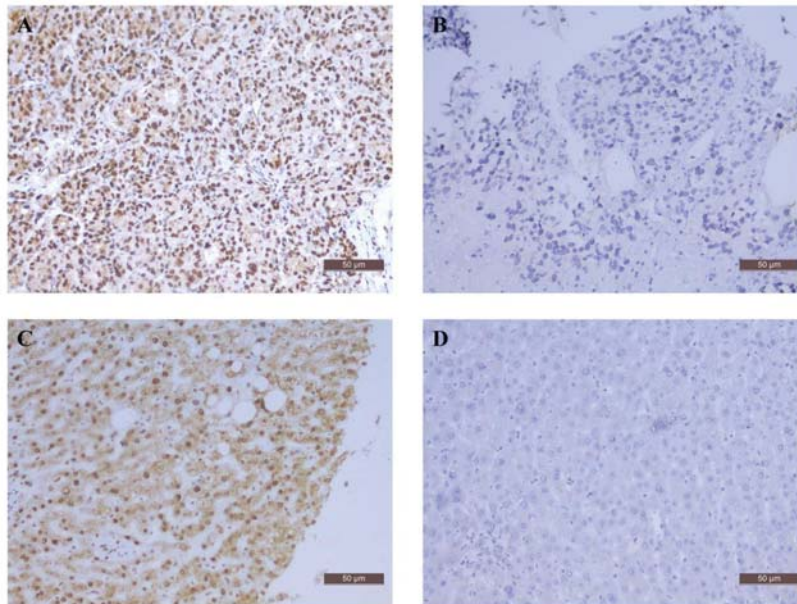

- **Supplemental Figure 2** SETDB1 IHC staining of (A) HCC tumor tissue with high SETDB1 expression and (B) low SETDB1 expression; (C) adjacent non-tumor tissue with high SETDB1 expression and (D) low SETDB1 expression.

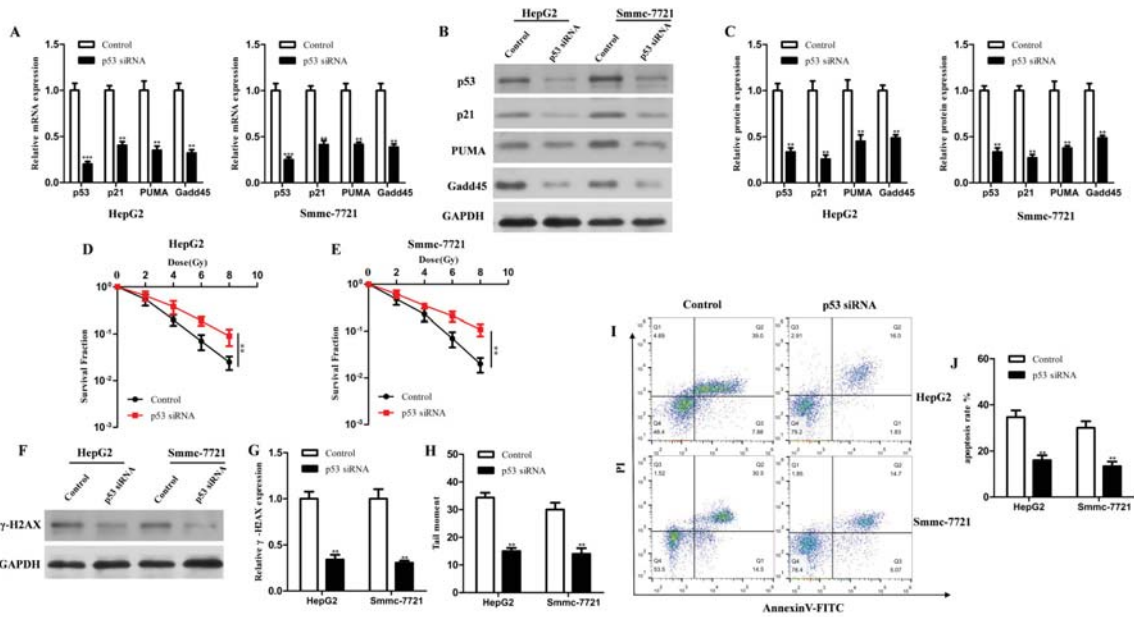

• **Supplemental Figure 3** Knock-down p53 enhances HCC cell radioresistance *in vitro*. (A) Expression of p53, p21, PUMA and Gadd45 mRNA detected by qRT-PCR in HepG2 and Smmc-7721 cells transfected with p53 siRNA or control. (B) Western blotting analysis of p53, p21, PUMA and Gadd45 protein in HepG2 and Smmc-7721 cells transfected with p53 siRNA or control. (C) Quantification of p53, p21, PUMA and Gadd45 protein. (D-E) HepG2 and Smmc-7721 cells transiently transfected with p53 siRNA or control were irradiated with a range of 2 to 8 Gy IR doses. After 14 days, colonies were stained and scored for colony formation and the SF was plotted as described in methods. (F) Western blotting analysis of  $\gamma$ -H2AX protein in HepG2 and Smmc-7721 cells transfected with p53 siRNA or control treated with a 4-Gy dose of IR. (G) Quantification of  $\gamma$ -H2AX protein. (H) The comet assay was used to evaluate DNA damage in HepG2 and Smmc-7721 cells transiently transfected p53 siRNA or control. Quantification of tail moment. (I-J) HepG2 and Smmc-7721 cells transfected with p53 siRNA or control were treated with a 4-Gy dose of IR. Treated cells were cultured for 24 h, harvested, stained with Annexin V-FITC/PI, and then analyzed using flow cytometry. Representative images and quantitative data are shown. Each column is shown as the means of three separate experiments. \* $P < 0.05$ , \*\* $P < 0.01$ , \*\*\* $P < 0.001$ .

Supplemental Table 1 Primer sequences used for qPCR assays

| Gene           | Sequence of the primers      |
|----------------|------------------------------|
| SETDB1-Forward | 5'-AAGACCAGAAGCTCCGTGAA-3'   |
| SETDB1-Reverse | 5'-CCTGGGAACTGCTCTTCTTG-3'   |
| p21-Forward    | 5'-GCAGACCAGCATGACAGATTTC-3' |
| p21-Reverse    | 5'-ATGTAGAGCGGGCCTTTGAG-3'   |
| PUMA-Forward   | 5'-CAGACTGTGAATCCTGTGCT-3'   |
| PUMA-Reverse   | 5'-ACAGTATCTTACAGGCTGGG-3'   |
| Gadd45-Forward | 5'-TGCGAGAACGACATCAACAT-3'   |
| Gadd45-Reverse | 5'-TCCCGGCAAAAACAAATAAG-3'   |
| p53-Forward    | 5'-GAGGTTGGCTCTGACTGTACC-3'  |
| p53-Reverse    | 5'-TCCGTCCCAGTAGATTACCAC-3'  |
| GAPDH-Forward  | 5'-CTCTCTGCTCTCCTGTTTCGAC-3' |
| GAPDH-Reverse  | 5'-TGAGCGATGTGGCTCGGCT-3'    |
| miR-621        | 5'-GGCTAGCAACAGCGCTTACCT-3'  |
| U6             | 5'-CGCAAGGATGACACGCAAATTC-3' |
